# Supplementary material for: Fabrication of CuO/BiVO 4 composites for enhanced visible-light-driven photocatalytic antibacterial activity
Source: Royal Society of Chemistry journal article supplement (doi:10.1039/d5ra06653k), 2025-01-01
Supplement: d5ra06653k1.pdf [file d5ra06653k1.pdf]

## Supplementary Materials

### Fabrication of CuO/BiVO<sub>4</sub> composites for enhanced visible-light-driven photocatalytic antibacterial activity

Jiao Zhao\*, He Yang, Chen Chen, Tong You, Xingyi Yu, Yan Zhang, Hongyan Liu,  
and Yimin Zhu\*

*Collaborative Innovation Center for Vessel Pollution Monitoring and Control, Dalian  
Maritime University, Dalian 116026, China.*

\* Corresponding E-mail: [zhaojiao@dlmu.edu.cn](mailto:zhaojiao@dlmu.edu.cn), [ntp@dlmu.edu.cn](mailto:ntp@dlmu.edu.cn)

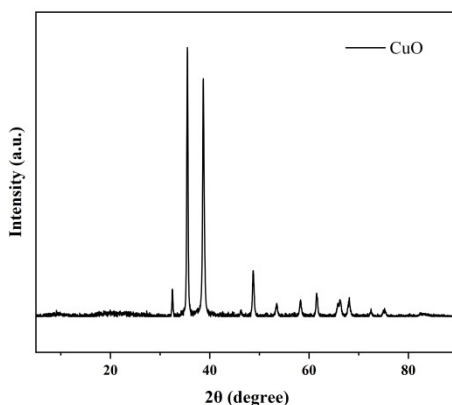

Figure S1. XRD pattern of CuO

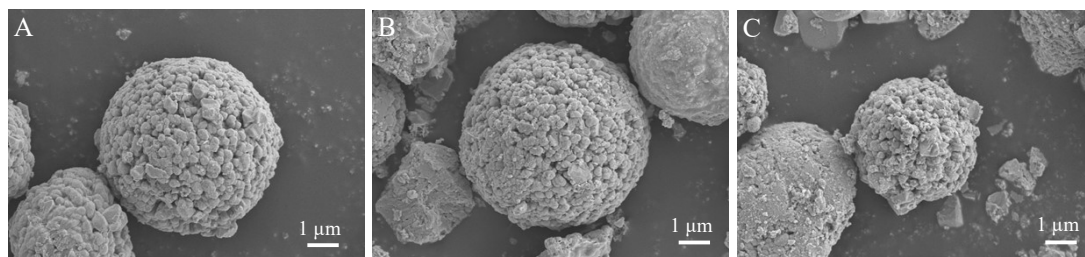

Figure S2. SEM images of CuO/BiVO<sub>4</sub> composite materials (A: CuO/BiVO<sub>4</sub>-10%; B: CuO/BiVO<sub>4</sub>-16.7%; C: CuO/BiVO<sub>4</sub>-20%)

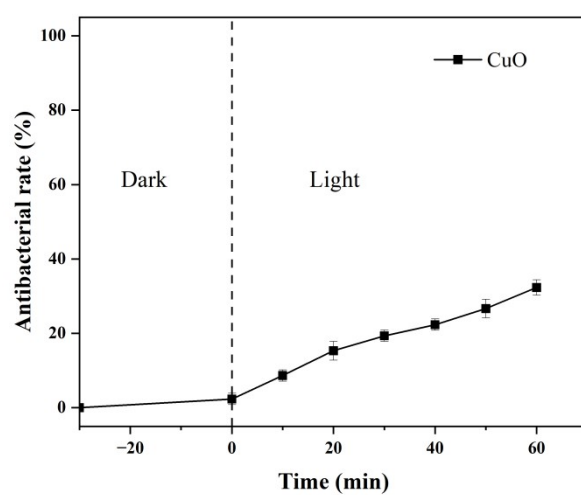

Figure S3. Antibacterial performance of CuO

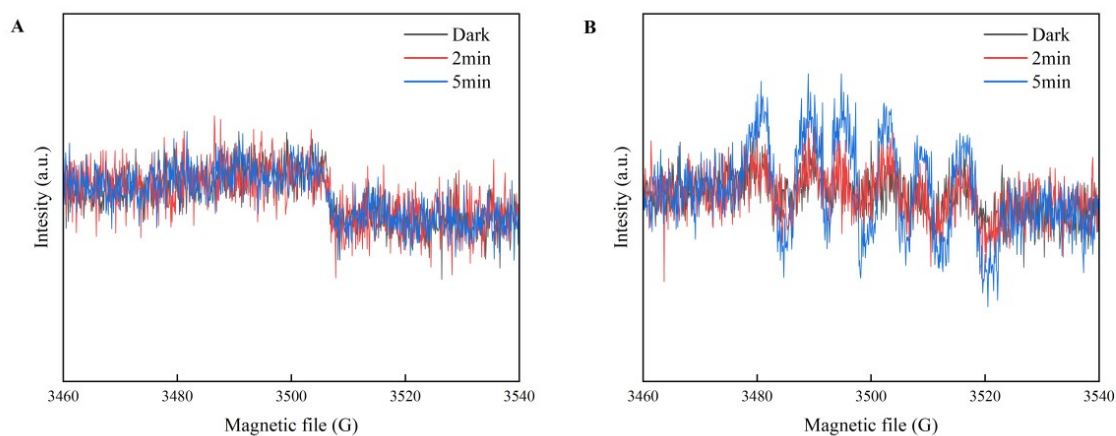

Figure S4. EPR spectra of  $\cdot\text{O}_2^-$  produced by (A)  $\text{BiVO}_4$  and (B)  $\text{CuO/BiVO}_4$

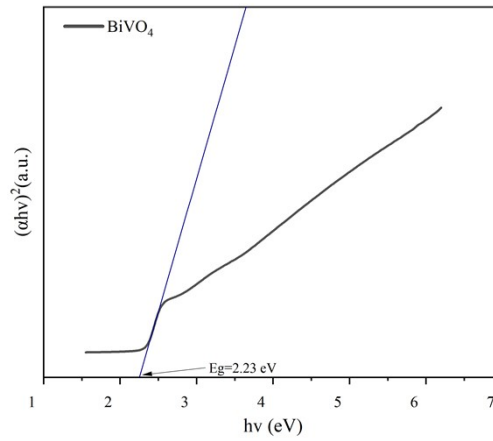

Figure S5. UV-Vis spectrum of BiVO<sub>4</sub>: relationship between  $(\alpha h\nu)^2$  and  $h\nu$

Based on the literature, the band gap of CuO was 1.7 eV, with the VB potential of 2.16 eV and CB potential of 0.46 eV<sup>[1]</sup>.

Based on the UV-vis DRS results, the band gap value of BiVO<sub>4</sub> was calculated by Equation (1), and a Tauc plot was constructed.

$$(\alpha h\nu)^n = A(h\nu - E_g) \quad (1)$$

Where A,  $E_g$ ,  $\alpha$ , h, and  $\nu$  denote the constant, band gap energy, absorption coefficient, Planck constant, and optical frequency, respectively. The value of n depends on the type of electronic transition in the semiconductor:  $n=2$  for semiconductors with direct allowed transitions and  $n=1/2$  for those with indirect allowed transitions. Since BiVO<sub>4</sub> is a semiconductor with direct allowed electronic transitions,  $E_g$  can be derived from the intercept of the  $(\alpha h\nu)^2$  curve on the x-axis. It can be seen from Figure S5 that the  $E_g$  value of BiVO<sub>4</sub> is 2.23 eV. The conduction band edge ( $E_{CB}$ ) and valence band edge ( $E_{VB}$ ) of a semiconductor can be calculated using the Equations (2-3)<sup>[2]</sup>.

$$E_{CB} = X - E_C - 1/2 E_g \quad (2)$$

$$E_{VB} = E_{CB} + E_g \quad (3)$$

Where X is the absolute electronegativity of the atom semiconductor;  $E_C$  is the energy of free electrons of the hydrogen scale (4.5 eV);  $E_g$  is the band gap of semiconductor; and  $E_{VB}$  is the VB edge potential and the  $E_{CB}$  is the CB edge potential.

It can be calculated that the valence band edge ( $E_{VB}$ ) of  $\text{BiVO}_4$  is 2.65 eV and the conduction band edge ( $E_{CB}$ ) of  $\text{BiVO}_4$  is 0.42 eV.

Table S1 Antibacterial performance of  $\text{BiVO}_4$  based nanomaterials

| Materials                                         | Preparation method            | Concentration ( $\mu\text{g/mL}$ ) | <i>E. coli</i> (CFU/mL) | Antibacterial rate | Ref.      |
|---------------------------------------------------|-------------------------------|------------------------------------|-------------------------|--------------------|-----------|
| $\text{V}_2\text{O}_5/\text{BiVO}_4$              | Precipitation                 | 1000                               | $10^8$                  | 99%                | [3]       |
| $\text{BiO}_4/\text{Bi}_2\text{WO}_6/\text{WO}_3$ | Hydrothermal                  | 1000                               | $10^6$                  | 100%               | [4]       |
| $\text{BiVO}_4/\text{g-C}_3\text{N}_4$            | In situ solid-state           | 800                                | $10^7$                  | 99%                | [5]       |
| $\text{Ag}/\text{BiVO}_4$                         | Hydrothermal                  | 1200                               | $10^6$                  | 100%               | [6]       |
| Fe-doped $\text{BiVO}_4$                          | Sol-Gel                       | 1000                               | $10^6$                  | 100%               | [7]       |
| Biochar/ $\text{BiVO}_4$                          | Impregnation-calcination      | 900                                | $10^6$                  | 99.5%              | [8]       |
| $\text{AgI}/\text{BiVO}_4$                        | Precipitation-photor eduction | 1000                               | $10^6$                  | 99.88%             | [9]       |
| $\text{CuO}/\text{BiVO}_4$                        | Impregnation-calcination      | 1000                               | $10^6$                  | 100%               | This work |

Table S2 Slope and  $R^2$  value of dynamic fitting curve

|                         | $\text{BiVO}_4$ | $\text{CuO}/\text{BiVO}_4$ -10% | $\text{CuO}/\text{BiVO}_4$ -12.5% | $\text{CuO}/\text{BiVO}_4$ -16.7% | $\text{CuO}/\text{BiVO}_4$ -20% |
|-------------------------|-----------------|---------------------------------|-----------------------------------|-----------------------------------|---------------------------------|
| k ( $\text{min}^{-1}$ ) | 0.00057         | 0.004                           | 0.00435                           | 0.00306                           | 0.00257                         |
| $R^2$                   | 0.96604         | 0.99618                         | 0.93699                           | 0.99508                           | 0.98899                         |

## References

- [1] Y. Kanigaridou, A. Petala, Z. Frontistis, M. Antonopoulou, M. Solakidou, I. Konstantinou, D. I. Kondarides. Solar photocatalytic degradation of bisphenol A with  $\text{CuO}_x/\text{BiVO}_4$ : insights into the unexpectedly favorable effect of bicarbonates[J]. Chemical Engineering Journal, 318 (2017) 39-49.
- [2] H. Xu, H. Li, C. Wu, J. Chu, Y. Yan, H. Shu, Z. Gu, Preparation, characterization and photocatalytic properties of Cu-loaded  $\text{BiVO}_4$ [J]. Journal of Hazardous Material, 153 (1-2) (2008)877-884.

- [3] Wang Y, Long Y, Zhang D. Novel bifunctional  $V_2O_5/BiVO_4$  nanocomposite materials with enhanced antibacterial activity[J]. Journal of the Taiwan Institute of Chemical Engineers, 2016, 68: 387-395.
- [4] Cho E-C, Hsiao Y-S, Huang J-H, et al. Construction of  $BiVO_4/Bi_2WO_6/WO_3$  heterojunctions with improved photocatalytic capability in elimination of dye and antibiotics and inactivation of *E. coli*[J]. Journal of the Taiwan Institute of Chemical Engineers, 2023, 149: 104991.
- [5] Khan A, Altaf M, Shahid M, et al. In situ solid-state fabrication of Z-Scheme  $BiVO_4/g-C_3N_4$  heterojunction photocatalyst with highly efficient-light visible activity and their antibacterial properties against bacterial pathogens[J]. Journal of Molecular Structure, 2024, 1300: 137222.
- [6] Regmi C, Dhakal D, Lee S W. Visible-light-induced  $Ag/BiVO_4$  semiconductor with enhanced photocatalytic and antibacterial performance[J]. Nanotechnology, 2018, 29(6): 064001.
- [7] Regmi C, Kshetri Y K, Kim T-H, et al. Visible-light-induced Fe-doped  $BiVO_4$  photocatalyst for contaminated water treatment[J]. Molecular Catalysis, 2017, 432: 220-231.
- [8] Wang T, Cai J, Zheng J, et al. Facile synthesis of activated biochar/ $BiVO_4$  heterojunction photocatalyst to enhance visible light efficient degradation for dye and antibiotics: applications and mechanisms[J]. Journal of Materials Research and Technology, 2022, 19: 5017-5036.
- [9] Xiang Z, Wang Y, Ju P, et al. Facile fabrication of  $AgI/BiVO_4$  composites with enhanced visible photocatalytic degradation and antibacterial ability[J]. Journal of Alloys and Compounds, 2017, 721: 622-627.
